# A New Method to Improve the Clinical Evaluation of Cystic Fibrosis Patients by Mucus Viscoelastic Properties

Giovanna Tomaiuolo<sup>1,2\*</sup>, Giulia Rusciano<sup>3</sup>, Sergio Caserta<sup>1,2</sup>, Antonio Carciati<sup>1</sup>, Vincenzo Carnovale<sup>4</sup>, Pasquale Abete<sup>4</sup>, Antonio Sasso<sup>3</sup>, Stefano Guido<sup>1,2</sup>

**1** Dipartimento di Ingegneria Chimica, dei Materiali e della Produzione Industriale, Università di Napoli Federico II, Napoli, Italy, **2** CEINGE-Advanced Biotechnologies, Napoli, Italy, **3** Dipartimento di Fisica, Università di Napoli Federico II, Complesso Universitario M.S. Angelo, Napoli, Italy, **4** Dipartimento di Scienze mediche Traslazionali - Unità di Fibrosi Cistica dell'adulto, Università di Napoli Federico II, Napoli, Italy

## Abstract

In cystic fibrosis (CF) patients airways mucus shows an increased viscoelasticity due to the concentration of high molecular weight components. Such mucus thickening eventually leads to bacterial overgrowth and prevents mucus clearance. The altered rheological behavior of mucus results in chronic lung infection and inflammation, which causes most of the cases of morbidity and mortality, although the cystic fibrosis complications affect other organs as well. Here, we present a quantitative study on the correlation between cystic fibrosis mucus viscoelasticity and patients clinical status. In particular, a new diagnostic parameter based on the correlation between CF sputum viscoelastic properties and the severity of the disease, expressed in terms of FEV1 and bacterial colonization, was developed. By using principal component analysis, we show that the types of colonization and FEV1 classes are significantly correlated to the elastic modulus, and that the latter can be used for CF severity classification with a high predictive efficiency (88%). The data presented here show that the elastic modulus of airways mucus, given the high predictive efficiency, could be used as a new clinical parameter in the prognostic evaluation of cystic fibrosis.

**Citation:** Tomaiuolo G, Rusciano G, Caserta S, Carciati A, Carnovale V, et al. (2014) A New Method to Improve the Clinical Evaluation of Cystic Fibrosis Patients by Mucus Viscoelastic Properties. PLoS ONE 9(1): e82297. doi:10.1371/journal.pone.0082297

**Editor:** Deepak Shukla, University of Illinois at Chicago, United States of America

**Received:** June 26, 2013; **Accepted:** October 22, 2013; **Published:** January 3, 2014

**Copyright:** © 2014 Tomaiuolo et al. This is an open-access article distributed under the terms of the Creative Commons Attribution License, which permits unrestricted use, distribution, and reproduction in any medium, provided the original author and source are credited.

**Funding:** Financial support from the Italian Ministry of Research under PRIN 2008 program is gratefully acknowledged. <http://prin.miur.it/index.php?page=2008>. The funders had no role in study design, data collection and analysis, decision to publish, or preparation of the manuscript.

**Competing interests:** The authors have declared that no competing interests exist.

\* E-mail: [g.tomaiuolo@unina.it](mailto:g.tomaiuolo@unina.it)

## Introduction

Cystic fibrosis (CF) is the most frequent life-limiting genetic disease in Caucasian populations, among whom it occurs in approximately 1 in 3000 births [1]. It is caused by mutations in a gene that encodes CF transmembrane conductance regulator (CFTR) protein which regulates the exchange of chloride and sodium ions across epithelial membranes [2-4]. The defect results in inflammation [5], infection and in thick, viscous mucoid secretions in multiple organs [6-9]. In healthy conditions, mucus is a complex fluid containing immunoglobulins, antiseptic enzymes, inorganic salts, proteins, glycoproteins known as mucins, and water. It is secreted by mucous cells and it has different functions, the most important one being acting as defense barrier against infectious agents [10,11]. From the rheological point of view, mucus is a dense, viscoelastic gel-like material, characterized by the presence of a large number of entanglements between glycoproteins and other mucosal components, stabilized by hydrogen bonding and electrostatic and hydrophobic interactions [12]. In CF patients, airways mucus, containing less water than normal,

and a rather high amount of cellular debris, shows an increased viscoelasticity due to the increased concentration of high molecular weight components, especially DNA, and associated physical entanglements at the molecular level [12]. Such mucus thickening leads to abnormal mucus clearance and, finally, to bacterial overgrowth [10]. From the clinical point of view, the altered rheological behavior of mucus results in lung chronic infection and inflammation, which causes most of the cases of morbidity and mortality, despite the CF complications affect other organs as well [13]. In light of such pathological relevance, the rheological characterization of body fluids such as blood [14-17], amniotic fluid, synovial fluid [18] and mucus [10,19] have been the subject of a number of studies. Regarding mucus, two main approaches have been followed so far: i) microrheology, that is based on a magnetic microrheometer, an elegant technique for measuring rheological properties [20] of small volume of mucus [21-23], as well as multiple particle tracking [12] and dynamic light scattering [24]; the drawbacks of these techniques are related to mucus heterogeneity [12]; ii) macrorheology, where classical

**Table 1.** Data on Age, Colonization, Sub-colonization, and FEV1 values of 33 CF donors.

| # ID | Age | Colonization                 | Sub colonization             | FEV 1 % |
|------|-----|------------------------------|------------------------------|---------|
| SA1  | 24  | Staphylococcus aureus        | Haemophilus Influenzae       | 97      |
| SA2  | 26  | Staphylococcus aureus        | Pseudomonas aeruginosa       | 79      |
| SA3  | 21  | Staphylococcus aureus        | Haemophilus Influenzae       | 70      |
| SA4  | 32  | Staphylococcus aureus        | Haemophilus Influenzae       | 69      |
| SA5  | 26  | Staphylococcus aureus        | Haemophilus Influenzae       | 64      |
| SA6  | 26  | Staphylococcus aureus        | Haemophilus Influenzae       | 43      |
| PA1  | 25  | Pseudomonas aeruginosa       | Staphylococcus aureus        | 81      |
| PA2  | 33  | Pseudomonas aeruginosa       | Staphylococcus aureus        | 61      |
| PA3  | 39  | Pseudomonas aeruginosa       | Staphylococcus aureus        | 57      |
| PA4  | 48  | Pseudomonas aeruginosa       | Staphylococcus aureus        | 43      |
| PA5  | 32  | Pseudomonas aeruginosa       | Staphylococcus aureus        | 48      |
| PA6  | 56  | Pseudomonas aeruginosa       | Haemophilus Influenzae       | 40      |
| PA7  | 28  | Pseudomonas aeruginosa       | Staphylococcus aureus        | 62      |
| PA8  | 31  | Pseudomonas aeruginosa       | Staphylococcus aureus        | 44      |
| PA9  | 28  | Pseudomonas aeruginosa       | Staphylococcus aureus        | 49      |
| PA10 | 26  | Pseudomonas aeruginosa       | Staphylococcus aureus        | 68      |
| PA11 | 27  | Pseudomonas aeruginosa       | Escherichia Coli             | 18      |
| PA12 | 28  | Pseudomonas aeruginosa       | Staphylococcus aureus        | 34      |
| PA13 | 44  | Pseudomonas aeruginosa       | Haemophilus Influenzae       | 36      |
| PA14 | 23  | Pseudomonas aeruginosa       | Staphylococcus aureus        | 32      |
| PA15 | 34  | Pseudomonas aeruginosa       | Staphylococcus aureus        | 21      |
| PA16 | 34  | Pseudomonas aeruginosa       | Staphylococcus aureus        | 59      |
| PA17 | 25  | Pseudomonas aeruginosa       | Staphylococcus aureus        | 25      |
| PA18 | 27  | Pseudomonas aeruginosa       | Staphylococcus aureus        | 68      |
| PA19 | 35  | Pseudomonas aeruginosa       | Staphylococcus aureus        | 23      |
| PA20 | 57  | Pseudomonas aeruginosa       | Haemophilus Influenzae       | 40      |
| BC1  | 25  | Burkholderia Cepacia         | Haemophilus Influenzae       | 40      |
| BC2  | 28  | Burkholderia Cepacia         | Pseudomonas aeruginosa       | 34      |
| BC3  | 40  | Burkholderia Cepacia         | Pseudomonas aeruginosa       | 25      |
| BC4  | 30  | Burkholderia Cepacia         | Pseudomonas aeruginosa       | 17      |
| SM1  | 24  | Pseudomonas aeruginosa       | Stenotrophomonas maltophilia | 20      |
| SM2  | 28  | Pseudomonas aeruginosa       | Stenotrophomonas maltophilia | 23      |
| SM3  | 40  | Stenotrophomonas maltophilia | Pseudomonas aeruginosa       | 31      |

doi: 10.1371/journal.pone.0082297.t001

rotational viscometers are used [25], either under continuous and oscillatory shear [19,26].

In this work, we investigate the correlation between CF sputum viscoelastic properties and disease severity, in terms of FEV1% and bacterial colonization. FEV1% is defined as the ratio of the Forced Expiratory Volume in 1 second (FEV1) to the Forced Vital Capacity (FVC). The FVC is the volume of air which can be forcibly and maximally exhaled out of the lungs until no more can be expired and is usually expressed in liters, thus FEV1% indicates what percentage of the total FVC has been expelled from the lungs during the first second of forced exhalation. In the following, FEV1% is represented by just FEV1. FEV1 is typically measured by spirometry, an highly patient cooperation-dependent maneuver, that shows several disadvantages, such as reproducibility. Here, we show that CF mucus elasticity and viscosity are strictly related with bacterial colonization, and can be used as diagnostic tools in addition to (and/or replacement of) FEV1, being independent on patient cooperation.

## Materials and Methods

### CF samples

Sputum samples were provided by the Dipartimento di Scienze Mediche Traslazionali - Unità di Fibrosi Cistica dell'adulto, following a procedure approved by the Ethics Committee of the Istituto Superiore di Sanità. Written informed consent was obtained from each individual. Sputum samples were collected in sterile containers from 33 patients (Table 1) affected by CF by voluntary expectoration during a routine clinical visit. The patients were categorized either as a function of bacterial colonization, i.e. i) Staphylococcus aureus; ii) Pseudomonas aeruginosa; iii) Burkholderia cepacia and Stenotrophomonas maltophilia, and of FEV1 value, i.e. i) FEV1 > 50% mild and moderate; ii) 30% < FEV1 < 50% severe; iii) FEV1 < 30% very severe. Freezing or homogenization of the sputum was not performed to avoid breakdown of structures.

## Rheological measurements on CF sputum

Rheological measurements were performed using a Bohlin Instruments CVO 120 controlled-stress rheometer [27,28] operating either in continuous shear and in dynamic oscillatory mode using a 60 mm smooth stainless steel cone-plate geometry (cone angle 0.0175 rad). The sample was loaded on the plate center and possible air bubbles were removed. A steel cylindrical cage enveloping the cone-plate system has been used to prevent sample drying [29]. All the measurements were performed at room temperature to reduce sample degradation (no significant difference was found by setting the temperature to 37°C). Continuous shear tests were performed in a range of stress equal to 0.01-40 Pa, going from low stresses to high stresses and back to low values, to evaluate the possible presence of hysteresis loop. The delay time has been set equal to 4 seconds and the integration time was 20 seconds. Concerning oscillatory test, amplitude sweeps were performed to determine a stress (0.05-6 Pa) at which the response of the elastic modulus ( $G'$ ) and loss modulus ( $G''$ ) was within the linear viscoelastic region of the sample. Finally, frequency sweeps (0.1-50 rad/s) were performed to determine  $G'$  and  $G''$  behavior. Data obtained from the rheological measurements were used to calculate useful parameters such as the magnitude of the complex modulus  $G^*$  (equal to the absolute value of the sum of  $G'$  and  $G''$ ) and loss tangent, or  $\tan \delta$  (equal to the ratio between  $G''$  and  $G'$ ) at low (1 rad/s) and high (10 rad/s) oscillation frequency. Two derivative parameters that predict mucus clearability by ciliary and cough mechanism are the Mucus Clearability index ( $MCI$ ) and the Cough Clearability index ( $CCI$ ) and are calculated by using the value of  $G^*$  and  $\tan \delta$  at low and high oscillation frequency respectively, as in the following formulas [23]:

$$MCI = 1.62 - (0.22 \cdot \log G^*|_{1\text{rad/s}}) - (0.77 \cdot \tan \delta|_{1\text{rad/s}})$$

$$CCI = 4.44 - (1.07 \cdot \log G^*|_{10\text{rad/s}}) + (0.89 \cdot \tan \delta|_{10\text{rad/s}})$$

## Principal Component Analysis

Principal Component Analysis (PCA) is a statistical tool, widely used in many fields of sciences, for the analysis of multidimensional data sets [30,31]. It is used to condense the information contained in an set of eventually correlated variables (e.g. the observables associated to a physical state), into a set of uncorrelated variables called Principal Components (PCs). PCs are obtained as linear combination of the original variables. The procedure of data transformation involves the diagonalization of the correlation matrix of the initial data; as a result, the PCs are uncorrelated data, and carry the most relevant information to differentiate among the initial data. The order of the PCs denotes their importance in highlighting differences within the dataset, with PC1 describing the highest amount of variation, PC2 the second highest, and so on. The coefficients of the combination of PCs in terms of the original variables are named loadings and express the weight of each original observable to the global variance of data. The coordinates of the original data sets in the PCs space are instead referred as scores. Usually, the first 3 PCs are able to condensate more than 90% of the initial information;

therefore, each set of the original data can be represented by a point in a low dimensional space (score-plot). Ideally, when plotted in the score space, points corresponding to similar data set should cluster together.

## Results and Discussion

### Rheological tests

An important property of mucus is its ability to maintain an unstirred layer of mucus adjacent to epithelial surfaces despite the vigorous shearing actions of coughing, and it does this by being a shear-thinning material that forms a lubricating plane between sliding surfaces [32]. In this work, CF sputum samples were subjected to steady state deformations of controlled shear stress to reproduce the *in vivo* conditions and study the behavior of sputum viscosity in continuous shear. The shear-thinning behavior of CF sputum is shown in Figure 1, where the average viscosity of CF sputum sample is shown as a function of the shear stress at which the sample is sheared, either for the level of severity (mild/moderate, severe and very severe depending on FEV1 values, as showed in Figure 1a) and for the type of bacterial colonization (*S. aureus*, *P. aeruginosa*, and *B. cepacia* and *S. maltophilia* (Figure 1b)). As can be seen in the log-log plot, mucus viscosity shows an initial plateau zone followed by a shear-thinning region as shear stress increases: this behavior is probably due to the decreasing adhesive interaction between mucin fibers with increasing shear stress. The shear stress value at the end of the plateau (i.e., at the onset of shear thinning) is associated with a characteristic relaxation time of the material and it is different for the three cases. The classification of the CF sputum samples based on FEV1 values (Figure 1a) is not full-scale, the viscosity of very severe data (gray circle) being significantly lower than the one of severe data (white circle). In Figure 1b it is evident, instead, that classifying mucus sample using bacterial colonization, allows to distinguish the CF severity. It is known, in fact, that *B. cepacia* and *S. maltophilia* lungs colonization increases the possibility of morbidity and mortality, being associated with a rapid decline in pulmonary function, more than *P. aeruginosa* and *S. aureus* [33-35]. In fact, the *B. cepacia* and *S. maltophilia* set of data (grey triangle) is significantly higher than the *S. aureus* one (black triangle), while the *P. aeruginosa* set shows a halfway trend, being close to the *S. aureus* data at low and medium shear stress (below 10 Pa) and overcoming the *B. cepacia* and *S. maltophilia* data at high shear stress. Error bars (such as in the following figures) represent the standard deviation of the measurements, which is mainly due to the quantity of saliva present in the sample that it was no possible to extract without damaging the samples. The t-test, on absolute values, was used to assess whether there is a statistically significant difference between the groups. For the mild-moderate and severe couple of data set the t-test passed for viscosities below 10 Pa both for FEV1 and bacterial colonization with  $P < 0.05$ . For the severe and very severe couple of data set the t test did not pass.

In Figure 1c a hysteresis loop of CF sputum is shown. This curve is obtained by increasing and subsequently decreasing the imposed shear stress. This behavior is typical of a time

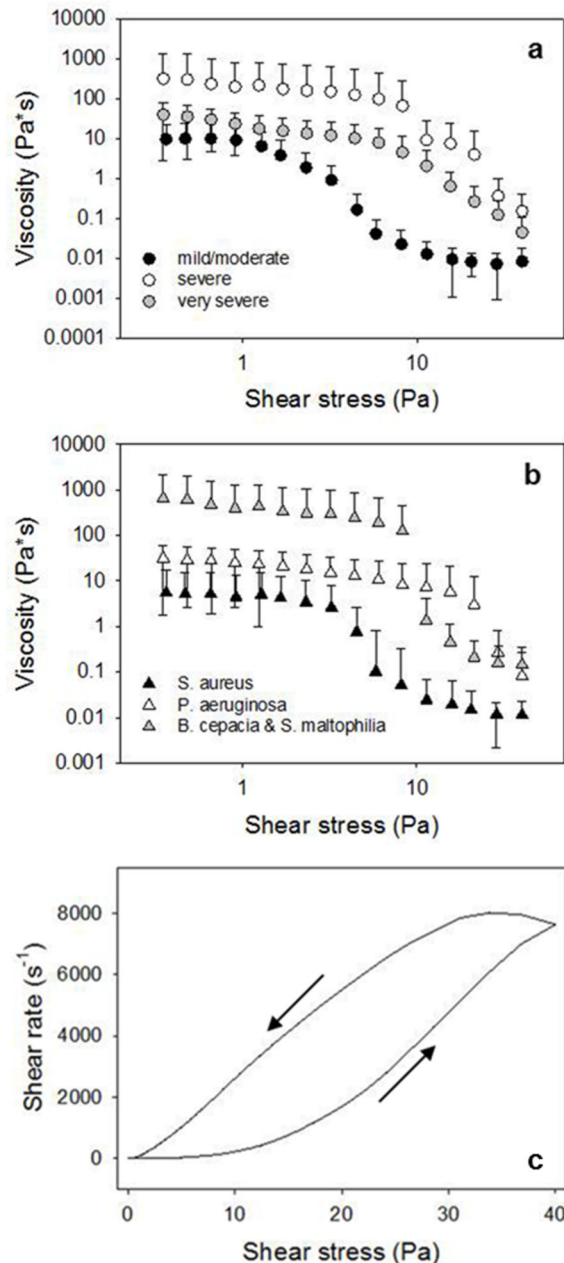

**Figure 1. The steady state viscosity of CF sputum sample from 33 donors.** a) Average viscosity from donors with different values of FEV1 (grey circle: very severe; white circle: severe; and black circle: mild/moderate) and b) Average viscosity from donors with different bacterial colonization (grey triangle: *B. cepacia* and *S. maltophilia*, white triangle: *P. aeruginosa* and black triangle: *S. aureus*). Both for FEV1 and bacterial colonization, there is a significant difference between *S. aureus* and *P. aeruginosa* ( $P < 0.05$ ) at viscosity values below 10 Pa. c) Hysteresis loop of CF sputum.

doi: 10.1371/journal.pone.0082297.g001

dependent material and it is found when an irreversible breakdown of microstructure is elicited by the action of shear flow, the material being then unable to reform its original structure in the time scale of the measurement. The first part of the up-curve (marked with an arrow going from left to right) presents an horizontal region where shear rate is around 0.

The last point of this region (ca 2 Pa) corresponds to the yield value of the material, i.e. the shear stress threshold above which the material is able to flow. Below the yield point the viscosity of the material is very high. The viscoelasticity of CF sputum was characterized by applying oscillatory deformations to the samples.  $G'$  is the *elastic* (or *storage*) *modulus*, which is

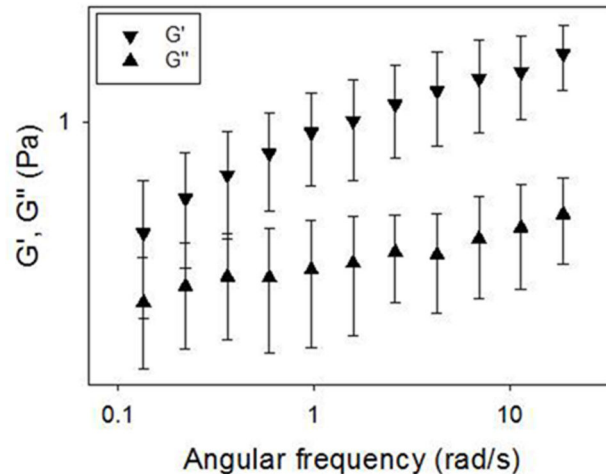

**Figure 2.  $G'$  and  $G''$  as a function of angular frequency.**  $G'$  and  $G''$  are almost parallel lines, typical of a cross-linked gel.

doi: 10.1371/journal.pone.0082297.g002

a measure of stored energy and represents the elastic component of the material  $G''$  is the *viscous (or loss) modulus*, is a measure of the energy dissipated in the material and represents the viscous component of the material. Both the elastic modulus  $G'$  and the viscous modulus  $G''$  increase with frequency over a range of 0.1-50 rad/s. The elastic modulus  $G'$  of CF sputum predominates over the viscous modulus  $G''$  across the entire tested range of frequency, as shown in Figure 2, where  $G'$  and  $G''$  are plotted as a function of angular frequency. The  $G'$  predominance as well as the very similar dependence of  $G'$  and  $G''$  on frequency ( $G'$  and  $G''$  are almost parallel lines) are typical features of a cross-linked gel. In Figures 3a and 3b,  $G'$  and  $G''$  as a function of angular frequency are respectively shown for three levels of FEV1, corresponding to mild/moderate, severe and very severe. Both the elastic and viscous moduli grow with the reduction of the lungs activity and thus with the disease severity. The t-test was used to prove if there is a statistically significant difference between the groups. For the mild-moderate and severe couple of data set the t-test passed for  $G'$  at low and high values of angular frequency (0.1 and 10 rad/s), with  $P=0.043$  and 0.048 respectively, while for  $G''$  it passed only for high values of angular frequency (10 rad/s) with  $P=0.019$ , this remarking the fact that the elastic contribution is the one that mostly correlates with disease severity. Concerning the correlation with bacterial colonization,  $G'$  and  $G''$  are respectively shown in Figures 3c and 3d as a function of angular frequency for *S. aureus*, *P. aeruginosa* and *B. cepacia* and *S. maltophilia*. Also in this case, both the elastic and viscous moduli grow with the reduction of the lungs activity and thus with the disease severity. The t-test confirms that there is a statistically significant difference between the groups: in fact, it passed either for  $G'$  and  $G''$  at each value of angular frequency. For example, for  $G'$  at 1 rad/s,  $P=0.041$  for *S. aureus* and *P. aeruginosa* data sets and at 10 rad/s  $P=0.008$  for *S. aureus* and *B. cepacia* and *S. maltophilia*, while for  $G''$  for *S. aureus* and *B. cepacia* and *S. maltophilia* data sets  $P=0.028$  and

$P=0.043$  at 1 rad/s and 10 rad/s respectively. It is evident that the classification based on bacterial colonization works better than the one based on FEV1. Thus, here, we propose a method to classify CF severity based on  $G'$  values at 1 rad/s and on the most diffused bacterial colonization. In particular,  $G' < 1.2$  Pa corresponds to *S. aureus*,  $1.2 \text{ Pa} < G' < 4$  Pa corresponds to *P. aeruginosa* and  $G' > 4$  Pa corresponds to *B. cepacia* and *S. maltophilia*. The advantage of this classification is that, in principle, it would be possible to identify the type of bacterial colonization in few minutes, avoiding the long time and the big cost requested by microbiological measurements. Moreover, it would be possible to isolate patient with *B. cepacia*, that is very aggressive in person-to-person spread.

In Figure 4 a plot of loss modulus  $G''(\omega)$  against storage modulus  $G'(\omega)$  for the three FEV1 level of severity (Figure 4a) and for the different families of colonization (Figure 4b) is reported. As it can be seen in Figure 4a, the three sets of data classified by using the FEV1 values, nearly collapse into a single curve. This indicates that the rheological behavior of these samples, in terms of microstructure, is independent on FEV1 severity. Once again, this plot shows that the values of  $G'$  are higher than the ones of  $G''$  (see the scales of the axes), indicating that the elastic response of the material prevails on the viscous one. In Figure 4b, instead, the three sets of data classified by using the bacterial colonization, lie on curves of different slopes, indicating that the rheological behavior of these samples, in terms of microstructure, is dependent on colonization. For an elastic network the complex modulus and both its components depend on material parameters such as the number of elastically active entanglements and the concentration of high molecular weight species. The different slopes in Figure 4b show a different sensitivity of the moduli on such material parameters depending on disease severity. Indeed, one can distinguish three zones in the plot in Figure 4b: i) low  $G'$  and  $G''$  values, where *S. aureus* data are found; ii) high  $G'$  and  $G''$  values, where there are *B. cepacia* and *S. maltophilia* data and iii) intermediate values of  $G'$  and  $G''$ , where



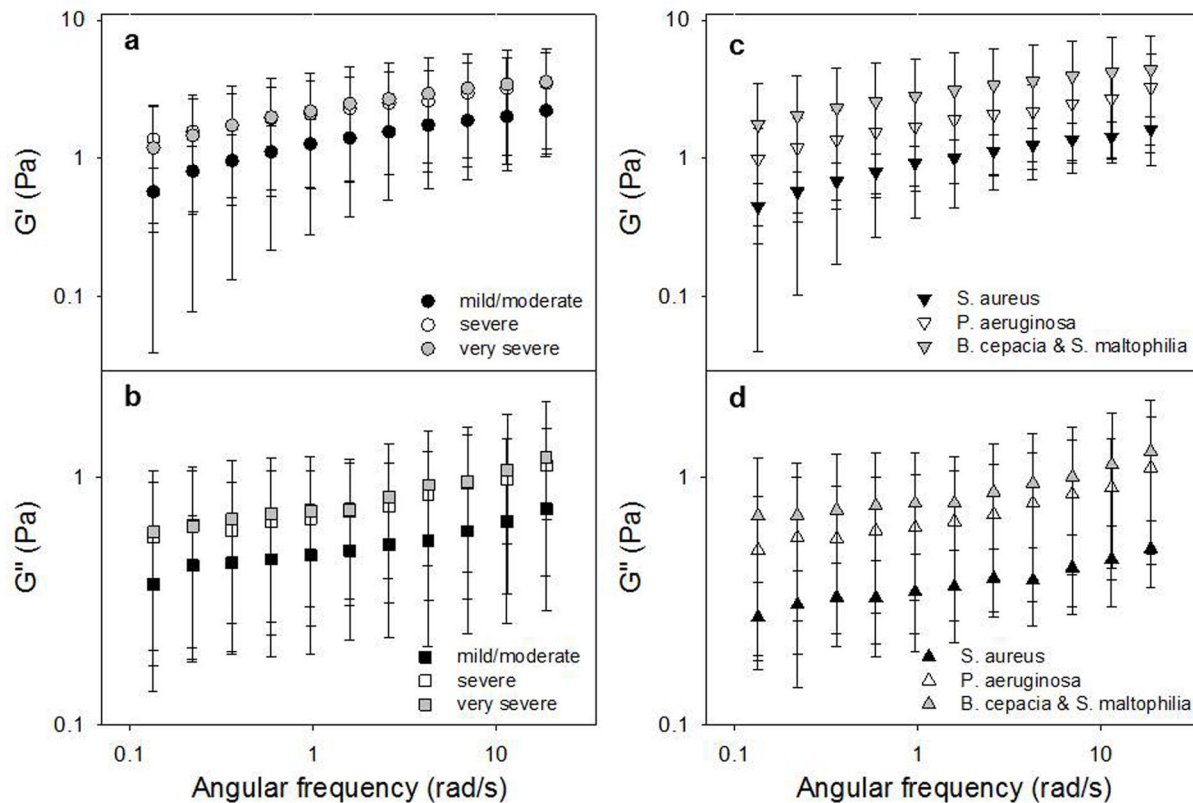

**Figure 3. The elastic and loss modulus of CF sputum sample from 33 donors.** a)  $G'$  and b)  $G''$  as a function of angular frequency for the three levels of CF severity (i.e. FEV1 values corresponding to mild/moderate, severe and very severe level); c)  $G'$  and d)  $G''$  as a function of angular frequency for different types of bacterial colonization (i.e. *S. aureus*, *P. aeruginosa* and *B. cepacia* and *S. maltophilia*).

doi: 10.1371/journal.pone.0082297.g003

*P. aeruginosa* data are found. Thus, a classification of the type of bacterial colonization can be based on this plot.

Two more viscoelastic parameters were considered, in agreement with the literature:  $\tan \delta$  (loss tangent) and  $G^*$  (magnitude of complex modulus), each measured at 1 rad/s. The former,  $\tan \delta$ , being the ratio of  $G''$  to  $G'$ , represents the ratio of the viscous part to the elastic part (energy loss/energy stored) of the materials, and it is an useful quantifier of the presence and extent of elasticity in a fluid. A material that presents high ( $\gg 1$ )  $\tan \delta$  deforms permanently when subjected to a stress and thus behaves as a liquid-like material; on the other hand, a material with low ( $\ll 1$ )  $\tan \delta$  recoils or snaps back after the stress is removed and shows a solid-like behavior. The latter,  $G^*$ , is defined by  $G^* = G' + iG''$ , where  $i$  is the imaginary unit. The magnitude of  $G^*$  is given by  $|G^*| = \sqrt{(G')^2 + (G'')^2}$  and represents the overall resistance to deformation of a material, regardless of whether that deformation is recoverable (elastic) or non-recoverable (viscous). Here, the magnitude of  $G^*$  is represented by just  $G^*$ . In Figure 5a and 5b the comparison between the classification of patients by FEV1 and by colonization are respectively shown for  $\tan \delta$  and  $\log G^*$ :  $\tan \delta$  (Figure 5a) is almost constant with

FEV1 severity, but decreases with the bacterial colonization (from *S. aureus* to *B. cepacia* and *S. maltophilia*) indicating that lung malfunction is caused by the increased elasticity of mucus.  $\log G^*$ , in Figure 5b, is significantly increased in *B. cepacia* and *S. maltophilia* samples as respect to *S. aureus* ( $P=0.018$  and  $P=0.035$  respectively) and this is another sign that elasticity governs mucus rheology in CF patients. For calculations of the mucociliary clearance index (*MCI*) and of the cough clearance index (*CCI*),  $G'$  and  $G''$  at low frequency (0.1 rad/s) and at high frequency (10 rad/s) have been used. The low and high frequencies approximate the time scales in the airways due to ciliary beat and cough, respectively. In Figure 6a, the *MCI* shows a weak decrement with the severity of the disease either for FEV1 and bacterial colonization, while the *CCI* (Figure 6b) is significantly decreased in the case of bacterial colonization for in *B. cepacia* and *S. maltophilia* samples as respect to *S. aureus* ( $P=0.014$ ).

**Statistical analysis**

As final step, we analyzed our rheological data by PCA. This analysis was carried out in order to: i) test the effectiveness of our data in assessing the differences between the considered

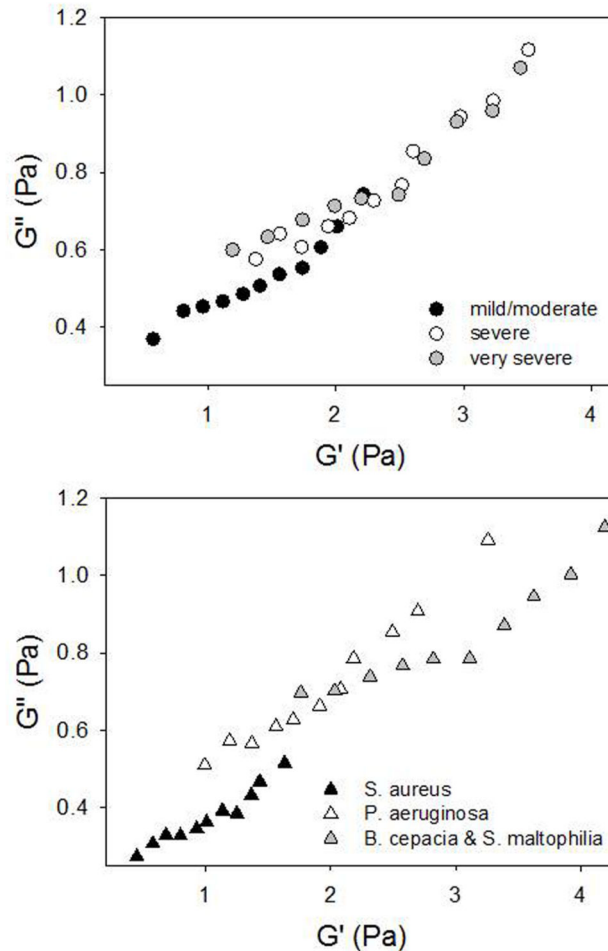

**Figure 4. The loss modulus  $G''(\omega)$  vs the elastic modulus  $G'(\omega)$ .**  $\omega$  values range from 0.134 rad/s to 18.7 rad/s.  $G''$  vs  $G'$  for a) FEV1 (grey circle: very severe; white circle: severe; black circle: mild/moderate) and b) bacterial colonization (grey triangle: *B. cepacia* and *S. maltophilia*; white triangle: *P. aeruginosa*; black triangle: *S. aureus*).

doi: 10.1371/journal.pone.0082297.g004

patients classes and *ii*) fully understand the relative importance of the different rheological data to classify patients. At this purpose, we associated to each of the 33 CF patients an array  $A_i$  of 11 selected rheological data (the so called observables), defined in Table 2. Therefore, these data were assembled in a  $33 \times 11$  matrix  $A_{ij}$ , with  $i$  running on the patients and  $j$  on the observables. PCA was therefore performed on this matrix by using a custom-made Matlab routine, decomposing  $A_{ij}$  in PCs. The PCA routine includes mean centering and standardization of the original raw data. Figure 7 reports the loading of the first two PCs, which globally take into account 98.2 % of the total data variability. It is interesting to note that the weight of the original rheological observables in the definition of PC1 is dominated by  $G'$  values (observables 1,3,5), while the contribution of  $G''$  values is strongly reduced. Moreover, the contribution of  $G'$  increases with the frequency. Both results evidently confirm the experimental outcomes shown in the previous sections. Less trivial is the interpretation of PC2 loading. As for PC1, also PC2 loading shows an oscillating

behavior between the  $G'$  and  $G''$  values; however, PC2 loading seems to suggest a contribution of MCI and CCI observables, whose values are enhanced with respect to PC1 loading. Figure 8 shows, instead, the scores of these PCs for each  $A_n$ , colored according to FEV class (Figure 8a) or to the patient bacterial colonization (Figure 8b). As it is possible to see from this figure, PCA analysis suggests some degree of correlation of rheological data with both patients infections and FEV1 values. In the case of bacterial colonization, points relative to *S. aureus*- and *P. aeruginosa* tend clearly to clusterize in the low PC1-score region, while *B. cepacia*- and *S. maltophilia* points tend to occupy the high PC1-score region. Globally, a rough divisions of patients is provided by the dashed line depicted in Figure 8b, which efficiently separates points corresponding to these two groups of patients. This suggests that there is a high correlation between the patient bacterial infection and the new rheological observables defined by PC1 and PC2. As shown in Figure 8b, points present some clusterization in the PC1-PC2 plane also according to their

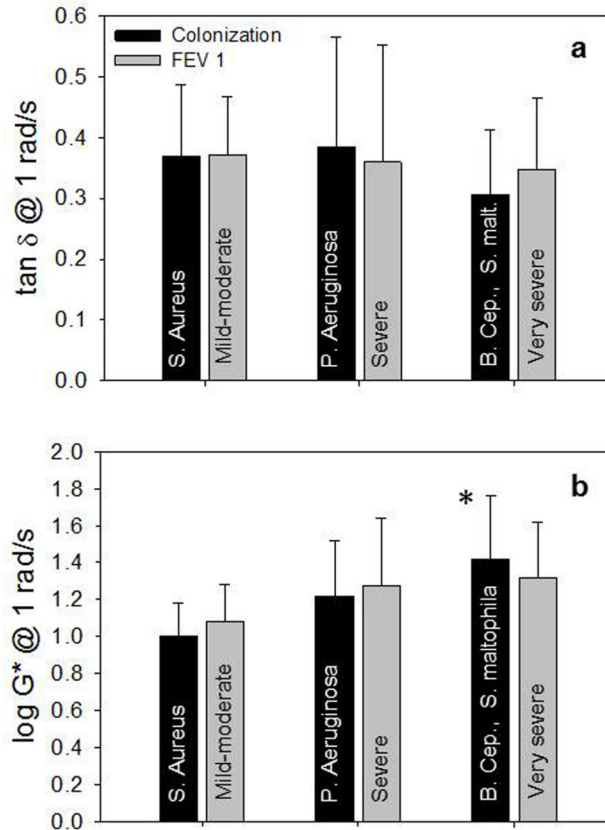

**Figure 5. The loss tangent  $\tan \delta$  and the log value of the magnitude of the complex modulus  $\log G^*$  as a function of bacterial colonization and FEV1.** a)  $\tan \delta$  (mean $\pm$ SD) at 1 rad/s as a function of bacterial colonization (black) and FEV1 severity (grey). In both cases the three set of data are not significantly different one from each other; b)  $\log G^*$  (mean $\pm$ SD) at 1 rad/s as a function of bacterial colonization (black) and FEV1 severity (grey). Regarding FEV1, the three set of data are not significantly different one from each other, while for bacterial colonization there is a significative difference between *S. aureus* and *B. cepacia* and *S. maltophilia* ( $P=0.035$ ).

doi: 10.1371/journal.pone.0082297.g005

FEV1 class, with mild/moderate and very severe patients presenting the lowest and the highest PC1 score, respectively. Moreover, mild/moderate patients exhibit also a slight clusterization along the PC2-score coordinate, while very severe patients present a wider spread along PC2-score axis. As for bacterial colonization, it is possible to define a line separating moderate/severe patients from the very-severe one (see continuous line in Figure 8b). Interestingly, two of the four apparently misclassified patients (BC2 and SM3) presents a FEV1 value which is border-line between the severe and very-severe FEV1 class (34 and 31, respectively). To test the effective reliability of PCA in discriminating CF patients according to both their bacterial infection and/or FEV1 class, we used the leave-one-out cross validation procedure (LOOCV) [36].

The results of this analysis were used to calculate the so called 'confusion matrix', in which all the correct guesses are located on the diagonal of the matrix (true positive, TP and true negative, TN), while misclassified data (false positive, FP and false negative, FN) are represented by the off-diagonal

elements. From this matrix, the accuracy  $A=(TP+TN)/(TP+TN+FP+FN)$  was calculated.

The confusion matrices for the two cases analyzed herein are reported below (Table 3 and 4). From their analysis it is possible to estimate a classification efficiency of about 88% in both cases. This is a quite good result, considering the rather limited number of patients analyzed in this study, and it holds promise for the development of an high efficient algorithm for CF patients classification only based on the measurement of objective rheological parameters.

## Conclusions

Rheological properties of mucus secretions from 33 Cystic Fibrosis patients were measured both under steady and oscillatory flow regime. The main finding is a strong correlation of the elastic component of the rheological response, as expressed by  $G'$ , with bacterial colonization and FEV1 values. Such correlation was found to be statistically significant by an advanced statistical analysis based on the PCA method,



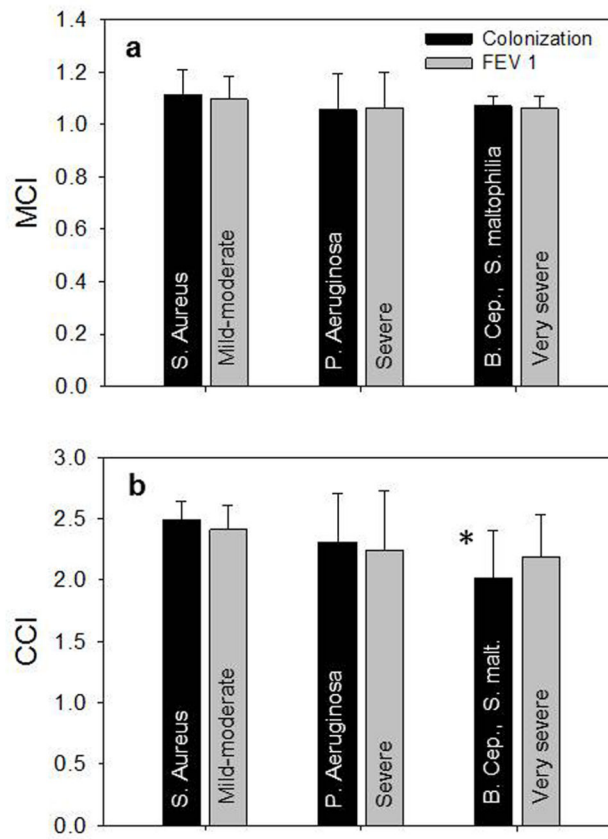

**Figure 6. MCI (mucociliary clearance index) and CCI (cough clearance index) as a function of bacterial colonization and FEV1.** a) MCI (mean±SD) at 1 rad/s as a function of bacterial colonization (black) and FEV1 severity (grey). In both cases the three set of data are not significantly different one from each other; b) CCI (mean±SD) at 10 rad/s as a function of bacterial colonization (black) and FEV1 severity (grey). Regarding FEV1, the three set of data are not significantly different one from each other, while for bacterial colonization there is a significative difference between S. aureus and B. cepacia and S. maltophilia (P=0.014).

doi: 10.1371/journal.pone.0082297.g006

**Table 2. Rheological observables used for PCA.**

| 1     | 2         | 3       | 4       | 5        | 6        | 7     | 8       | 9       | 10  | 11  |
|-------|-----------|---------|---------|----------|----------|-------|---------|---------|-----|-----|
| G'0.1 | G''       | G'      | G''     | G'       | G''      | η     | Log G*  | tan δ   | MCI | CCI |
| rad/s | 0.1 rad/s | 1 rad/s | 1 rad/s | 10 rad/s | 10 rad/s | 10 Pa | 1 rad/s | 1 rad/s |     |     |

More specifically, the  $j^{\text{th}}$  column of this table defines the observable of the column  $\bar{j}$  of the matrix of data  $A_{ij}$  ( $j=\bar{j}$ ,  $i$  running on the [1-33] interval).

doi: 10.1371/journal.pone.0082297.t002

showing that the types of colonization and FEV1 classes are significantly correlated to the elastic modulus. The latter can be used for CF severity classification with a high predictive efficiency (88%). We therefore propose rheological measurements of mucus elasticity as a new way of CF patient classification, which could be applied as an additional tool for prognostic purposes together with the FEV1 index. Compared to FEV1, rheological tests have the advantage of being less patient dependent, since they are based on measurements of mucus samples with well-established scientific methodology, cheaper and less time consuming. Since a rheometer is not

typically available in a clinical laboratory, a further possible application of this work is in the design of a device to measure mucus elasticity. Such a device could be disposable, user-friendly and cheap, and would allow one to use rheological parameters as a prognostic tool in the routine clinical tests.

Moreover, rheological characterization could allow to monitor the effect of pharmacological treatments (DNase, antibiotic, mucolytic, anti-inflammatory) *in vitro*. Many studies revealed that the high density mucus secretion in CF, and in other pulmonary diseases, has a detrimental effect on drugs delivery, due to their hindered diffusion through the highly viscous

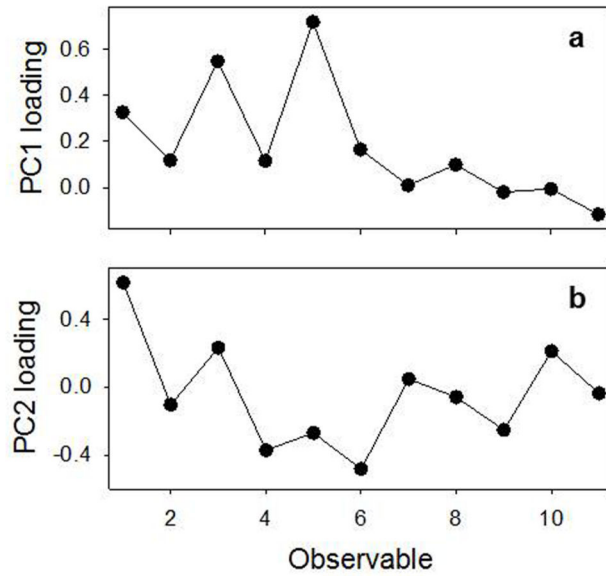

**Figure 7. Loading plot for the first two PCs, taking globally into account 98.2% of data variability.**

doi: 10.1371/journal.pone.0082297.g007

mucous layer. The rheological characterization proposed in this work could guide the development of new ways of administering therapeutics with increased local drug

concentration in patients with reduced functionality of the CFTR protein [37,38].

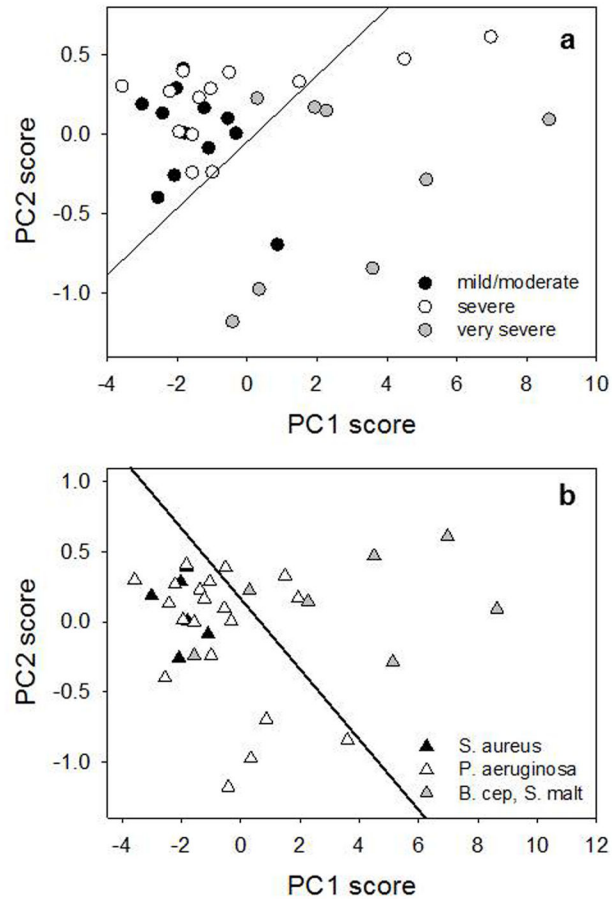

**Figure 8. Principal Components Scatter Plot for the first two PCs.** Points corresponding to the different patients are colored according to the patient bacterial colonization (a) or FEV1 class (b).

doi: 10.1371/journal.pone.0082297.g008

**Table 3.** Confusion matrix for CF-patients, classified according to their bacterial colonization.

| TRUE CLASSIFICATION        | PREDICTED CLASSIFICATION |                            |
|----------------------------|--------------------------|----------------------------|
|                            | S. aureus, P. aeruginosa | B. cepacia, S. maltophilia |
| S. aureus, P. aeruginosa   | 23                       | 3                          |
| B. cepacia, S. maltophilia | 1                        | 6                          |

doi: 10.1371/journal.pone.0082297.t003

**Table 4.** Confusion matrix for CF-patients, classified according to their FEV 1 class.

| TRUE CLASSIFICATION   | PREDICTED CLASSIFICATION |             |
|-----------------------|--------------------------|-------------|
|                       | Mild/Moderate, Severe    | Very severe |
| Mild/Moderate, Severe | 22                       | 3           |
| Very severe           | 1                        | 7           |

doi: 10.1371/journal.pone.0082297.t004

## Acknowledgements

The authors wish to thank Prof. Giuseppe Marrucci for helpful discussion, Dr Rossella Tomaiuolo for fruitful suggestions, Speranza Esposito and Giuseppe Zeno for help in the experimental part. This study is related to the activity of the European network action COST MP1106 "Smart and green interfaces - from single bubbles and drops to industrial, environmental and biomedical applications".

## Author Contributions

Conceived and designed the experiments: GT SG. Performed the experiments: GT AC. Analyzed the data: GT GR.

## References

- O'Sullivan BP, Freedman SD (2009) Cystic fibrosis. *Lancet* 373: 1891-1904. doi:10.1016/S0140-6736(09)60327-5. PubMed: 19403164.
- Davis PB, Drumm M, Konstan MW (1996). *Journal of Cystic Fibrosis - Am J Respir Crit Care Med* 154: 1229-1256. doi:10.1164/ajrccm.154.5.8912731.
- Davis PB (2001). *Journal of Cystic Fibrosis - Pediatr Rev* 22: 257-264.
- Vij N, Downey GP (2013) The Yin and Yang of Cystic Fibrosis Transmembrane Conductance Regulator Function. *Am J Respir Crit Care Med* 187: 120-122. doi:10.1164/rccm.201211-2011ED. PubMed: 23322792.
- Maiuri L, Luciani A, Giardino I, Raia V, Vilella VR et al. (2008) Tissue transglutaminase activation modulates inflammation in cystic fibrosis via PPARgamma down-regulation. *J Immunol*, 180: 7697-7705. PubMed: 18490773.
- Voter KZ, Ren CL (2008) Diagnosis of Cystic Fibrosis. *Clin Rev Allergy Immunol* 35: 100-106. doi:10.1007/s12016-008-8078-x. PubMed: 18506640.
- Sheppard MN, Nicholson AG (2002) The pathology of cystic fibrosis. *Curr Diagn Pathol* 8: 50-59. doi:10.1054/cdip.2001.0088.
- Amato F, Bellia C, Cardillo G, Castaldo G, Ciaccio M, et al. (2012) Extensive molecular analysis of patients bearing CFTR-related disorders. *J Mol Diagn. United States: 2012 American Society for Investigative Pathology and the Association for Molecular Pathology. Published by Elsevier Inc.* pp. 81-89
- Tomaiuolo R, Fausto M, Elce A, Strina I, Ranieri A et al. (2011) Enhanced frequency of CFTR gene variants in couples who are candidates for assisted reproductive technology treatment. *Clin Chem Lab Med* 49: 1289-1293. PubMed: 21679131.
- Lai SK, Wang Y-Y, Wirtz D, Hanes J (2009) Micro- and macrorheology of mucus. *Adv Drug Deliv Rev* 61: 86-100. doi:10.1016/j.addr.2008.09.012. PubMed: 19166889.
- Lai SK, Wang YY, Cone R, Wirtz D, Hanes J (2009) Altering mucus rheology to "solidify" human mucus at the nanoscale. *PLOS ONE* 4: e4294. doi:10.1371/journal.pone.0004294. PubMed: 19173002.
- Dawson M, Wirtz D, Hanes J (2003) Enhanced Viscoelasticity of Human Cystic Fibrotic Sputum Correlates with Increasing Microheterogeneity in Particle. *Transport - J Biol Chem* 278: 50393-50401.
- Stenbit AE, Flume PA (2011) Pulmonary exacerbations in cystic fibrosis. *Curr Opin Pulm Med* 17: 442-447. PubMed: 21881509.
- Tomaiuolo G, Barra M, Preziosi V, Cassinese A, Rotoli B et al. (2011) Microfluidics analysis of red blood cell membrane viscoelasticity. *Lab Chip* 11: 449-454. doi:10.1039/c0lc00348d. PubMed: 21076756.
- Tomaiuolo G, Guido S (2011) Start-up shape dynamics of red blood cells in microcapillary flow. *Microvasc Res* 82: 35-41. doi:10.1016/j.mvr.2011.03.004. PubMed: 21397612.
- Tomaiuolo G, Rossi D, Caserta S, Cesarelli M, Guido S (2012) Comparison of two flow-based imaging methods to measure individual red blood cell area and volume. *Cytometry A* 81: 1040-7. PubMed: 23081807.
- Tomaiuolo G, Lanotte L, Ghigliotti G, Misbah C, Guido S (2012) Red blood cell clustering in Poiseuille microcapillary flow. *Phys Fluids* 24: 051903-051908. doi:10.1063/1.4721811.
- Livak-Dahl E, Lee J, Burns MA (2013) Nanoliter droplet viscometer with additive-free operation. *Lab Chip* 13: 297-301. doi:10.1039/c2lc41130j. PubMed: 23192296.
- Davis SS, Dippy JE (1969) The rheological properties of sputum. *Biorheology* 6: 11-21. PubMed: 5806400.
- Jonás A, De Luca AC, Pesce G, Rusciano G, Sasso A et al. (2010) Diffusive mixing of polymers investigated by Raman microspectroscopy and microrheology. *Langmuir* 26: 14223-14230. doi:10.1021/la101498h. PubMed: 20681558.
- King M, Macklem PT (1977) Rheological properties of microliter quantities of normal mucus. *J Appl Physiol Respir Environ Exerc Physiol* 42: 797-802. PubMed: 142075.
- King M, Dasgupta B, Tomkiewicz RP, Brown NE (1997) Rheology of cystic fibrosis sputum after in vitro treatment with hypertonic saline alone and in combination with recombinant human deoxyribonuclease I. *Am J Respir Crit Care Med* 156: 173-177. doi:10.1164/ajrccm.156.1.9512074. PubMed: 9230743.
- Feng W, Garrett H, Speert DP, King M (1998) Improved clearability of cystic fibrosis sputum with dextran treatment in vitro. *Am J Respir Crit Care Med* 157: 710-714. doi:10.1164/ajrccm.157.3.9703059. PubMed: 9517580.
- Celli J, Gregor B, Turner B, Afdhal NH, Bansil R et al. (2005) Viscoelastic properties and dynamics of porcine gastric mucin. *Biomacromolecules* 6: 1329-1333. doi:10.1021/bm0493990. PubMed: 15877349.
- Minale M, Caserta S, Guido S (2010) Microconfined shear deformation of a droplet in an equiviscous non-newtonian immiscible fluid: experiments and modeling. *Langmuir* 26: 126-132. doi:10.1021/la902187a. PubMed: 20038166.
- Serisier DJ, Carroll MP, Shute JK, Young SA (2009) Macrorheology of cystic fibrosis, chronic obstructive pulmonary disease & normal sputum. *Respir Res* 10: 63-. PubMed: 19580650.
- Caserta S, Simeone M, Guido S (2008) Shear Banding in Biphasic Liquid-Liquid Systems. *Phys Rev Lett* 100: 137801. doi:10.1103/PhysRevLett.100.137801. PubMed: 18517998.
- Caserta S, Guido S (2012) Vorticity banding in biphasic polymer blends. *Langmuir* 28: 16254-16262. doi:10.1021/la303232w. PubMed: 23134311.
- Caserta S, Sabetta L, Simeone M, Guido S (2005) Shear-induced coalescence in aqueous biopolymer mixtures. *Chemical Engineering Sciences* 60: 1019-1027. doi:10.1016/j.ces.2004.09.076.
- Jolliffe IT (2002) *Principal Component Analysis*. Berlin: Springer Verlag.
- Vandenginste BGM, Massart DL, Buydens LMC, de Jong S, Lewi P et al. (1998) *Handbook of Chemometrics and Qualimetrics B* Amsterdam. Elsevier.
- Cone RA (2009) Barrier properties of mucus. *Adv Drug Deliv Rev* 61: 75-85. doi:10.1016/j.addr.2008.09.008. PubMed: 19135107.
- Gilligan PH (1991) Microbiology of airway disease in patients with cystic fibrosis. *Clin Microbiol Rev* 4: 35-51. PubMed: 1900735.
- Harrison F (2007) Microbial ecology of the cystic fibrosis lung. *Microbiology* 153: 917-923. doi:10.1099/mic.0.2006/004077-0. PubMed: 17379702.
- Waters V, Yau Y, Prasad S, Lu A, Atenafu E et al. (2011) Stenotrophomonas maltophilia in Cystic Fibrosis. *Am J Respir Crit Care Med* 183: 635-640. doi:10.1164/rccm.201009-1392OC. PubMed: 20889901.
- de Jong BWD, Bakker Schut TC, Maquelin K, van der Kwast T, Bangma CH et al. (2006) Discrimination between Nontumor Bladder

- Tissue and Tumor by Raman. Spectroscopy - Anal Chem 78: 7761-7769.
37. Amato F, Seia M, Giordano S, Elce A, Zarrilli F et al. (2013) Gene Mutation in MicroRNA Target Sites of CFTR Gene: A Novel Pathogenetic Mechanism in Cystic Fibrosis? PLOS ONE 8: e60448. doi:10.1371/journal.pone.0060448. PubMed: 23555973.
38. Giordano S, Amato F, Elce A, Monti M, Iannone C et al. (2013) Molecular and Functional Analysis of the Large 5' Promoter Region of CFTR Gene Revealed Pathogenic Mutations in CF and CFTR-Related Disorders - J Mol Diagn 15: 331-340. doi:10.1016/j.jmoldx.2013.01.001.
